# Supplementary material for: Genomic and Temporal Trends in Canine ExPEC Reflect Those of Human ExPEC
Source: PubMed Central journal article supplement (PMC9241711; doi:10.1128/spectrum.01291-22), 2022-06-08
Supplement: reviewer-comments.pdf [file reviewer-comments.pdf]

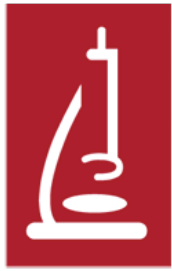

AMERICAN  
SOCIETY FOR  
MICROBIOLOGY

# Microbiology Spectrum

## Genomic and temporal trends in canine ExPEC reflect those of human ExPEC

Paarthiphan Elankumaran, Max Cummins, Glenn Browning, Marc Marena, Cameron Reid, and Steven Djordjevic

*Corresponding Author(s): Steven Djordjevic, Australian Institute for Microbiology and Infection*

---

### Review Timeline:

|                     |               |
|---------------------|---------------|
| Submission Date:    | April 7, 2022 |
| Editorial Decision: | May 16, 2022  |
| Revision Received:  | May 22, 2022  |
| Accepted:           | May 24, 2022  |

---

*Editor: Cheryl Andam*

*Reviewer(s): Disclosure of reviewer identity is with reference to reviewer comments included in decision letter(s). The following individuals involved in review of your submission have agreed to reveal their identity: Jorge Blanco (Reviewer #1); Tim Downing (Reviewer #2)*

### Transaction Report:

(Note: With the exception of the correction of typographical or spelling errors that could be a source of ambiguity, letters and reports are not edited. The original formatting of letters and referee reports may not be reflected in this compilation.)

DOI: <https://doi.org/10.1128/spectrum.01291-22>

May 16, 2022

Prof. Steven Philip Djordjevic  
Australian Institute for Microbiology and Infection  
15 Broadway, University of Technology Sydney  
Ultimo, NSW 2007  
Australia

Re: Spectrum01291-22 (Genomic and temporal trends in canine ExPEC reflect those of human ExPEC)

Dear Prof. Steven Philip Djordjevic:

Thank you for submitting your manuscript to Microbiology Spectrum. When submitting the revised version of your paper, please provide (1) point-by-point responses to the issues raised by the reviewers as file type "Response to Reviewers," not in your cover letter, and (2) a PDF file that indicates the changes from the original submission (by highlighting or underlining the changes) as file type "Marked Up Manuscript - For Review Only". Please use this link to submit your revised manuscript - we strongly recommend that you submit your paper within the next 60 days or reach out to me. Detailed instructions on submitting your revised paper are below.

Link Not Available

Below you will find instructions from the Microbiology Spectrum editorial office and comments generated during the review.

ASM policy requires that data be available to the public upon online posting of the article, so please verify all links to sequence records, if present, and make sure that each number retrieves the full record of the data. If a new accession number is not linked or a link is broken, provide production staff with the correct URL for the record. If the accession numbers for new data are not publicly accessible before the expected online posting of the article, publication of your article may be delayed; please contact the ASM production staff immediately with the expected release date.

The ASM Journals program strives for constant improvement in our submission and publication process. Please tell us how we can improve your experience by taking this quick [Author Survey](#).

Sincerely,

Cheryl Andam

Editor, Microbiology Spectrum

Journals Department  
American Society for Microbiology  
1752 N St., NW  
Washington, DC 20036  
E-mail: [spectrum@asmusa.org](mailto:spectrum@asmusa.org)

Reviewer comments:

Reviewer #2 (Comments for the Author):

This paper is very good. It examines ExPEC in companion animal samples over time (2007-17). Although it is from a precise region, limited work in this area has been completed on human-animal transmission patterns in this context. It provides a comprehensive overview of the STs, VF genes, AMR genes and plasmid profiles in this unique collection. It identifies human-pet ExPEC transmission which is important for the community and our understanding of One Health. The data is understandably heterogeneous, so this study provides a foundation for future work. The sequence data is publicly available, as is the code (as far as I can see, >1200 lines of code so I didn't run it all) - it's good to see Open Science principles being applied here.

Major comment:

Discussion "which we argue tentatively supports a paradigm of primarily human to dog transfer" - I don't see how you can justify this from limited observational data alone. I think this clause is inaccurate, and overstates the strength of evidence available. One would need to model relative rates of dog-dog, human-human, dog-human, and human-dog transfer to quantify this to infer real relative transfer rates.

Minor comments:

Figure 1d - the y-axis should be the count (like in b) not the proportion IMHO, because the varying sample sizes per annum distort the perceived rates for the reader.

Methods: "A custom R script was written in RStudio 1.4.1106 with R 4.0.5 to perform secondary analyses on the primary data generated by the aforementioned methods, and to generate publication figures" - can you clarify which 2y analyses and which methods, it is not 100% clear for the reader.

Other comments:

Roary was used, which is fine for this study, but the authors should note for the future that there are now superior methods (at least 4).

Staff Comments:

### Preparing Revision Guidelines

To submit your modified manuscript, log onto the eJP submission site at <https://spectrum.msubmit.net/cgi-bin/main.plex>. Go to Author Tasks and click the appropriate manuscript title to begin the revision process. The information that you entered when you first submitted the paper will be displayed. Please update the information as necessary. Here are a few examples of required updates that authors must address:

- Point-by-point responses to the issues raised by the reviewers in a file named "Response to Reviewers," NOT IN YOUR COVER LETTER.
- Upload a compare copy of the manuscript (without figures) as a "Marked-Up Manuscript" file.
- Each figure must be uploaded as a separate file, and any multipanel figures must be assembled into one file.
- Manuscript: A .DOC version of the revised manuscript
- Figures: Editable, high-resolution, individual figure files are required at revision, TIFF or EPS files are preferred

For complete guidelines on revision requirements, please see the journal Submission and Review Process requirements at <https://journals.asm.org/journal/Spectrum/submission-review-process>. **Submissions of a paper that does not conform to Microbiology Spectrum guidelines will delay acceptance of your manuscript.** "

Please return the manuscript within 60 days; if you cannot complete the modification within this time period, please contact me. If you do not wish to modify the manuscript and prefer to submit it to another journal, please notify me of your decision immediately so that the manuscript may be formally withdrawn from consideration by Microbiology Spectrum.

If your manuscript is accepted for publication, you will be contacted separately about payment when the proofs are issued; please follow the instructions in that e-mail. Arrangements for payment must be made before your article is published. For a complete list of **Publication Fees**, including supplemental material costs, please visit our [website](#).

Corresponding authors may [join or renew ASM membership](#) to obtain discounts on publication fees. Need to upgrade your membership level? Please contact Customer Service at [Service@asmusa.org](mailto:Service@asmusa.org).

Thank you for submitting your paper to Microbiology Spectrum.

## **Response to Reviewer**

We would like to kindly thank the reviewer for taking the time to review our manuscript. We particularly appreciate the acknowledgement of our efforts to make data and analysis scripts available as we believe this is critical to good scientific practice in computational research. We have responded to all comments below and incorporated changes as suggested.

Kind regards,

Steven Djordjevic

## **Reviewer comments**

This paper is very good. It examines ExPEC in companion animal samples over time (2007-17). Although it is from a precise region, limited work in this area has been completed on human-animal transmission patterns in this context. It provides a comprehensive overview of the STs, VF genes, AMR genes and plasmid profiles in this unique collection. It identifies human-pet ExPEC transmission which is important for the community and our understanding of One Health. The data is understandably heterogeneous, so this study provides a foundation for future work. The sequence data is publicly available, as is the code (as far as I can see, >1200 lines of code so I didn't run it all) - it's good to see Open Science principles being applied here.

### **Major comment:**

Discussion "which we argue tentatively supports a paradigm of primarily human to dog transfer" - I don't see how you can justify this from limited observational data alone. I think this clause is inaccurate, and overstates the strength of evidence available. One would need to model relative rates of dog-dog, human-human, dog-human, and human-dog transfer to quantify this to infer real relative transfer rates.

**Response:** We concede that this tentative argument is not conclusively supported by the data analysis in this paper. Rather, it reflects a combination of observations in our genomic epidemiological data from this paper and others, as well as the intuition that most dogs would have a far smaller potential network for microbial transfer than their owners, favouring a scenario where they are primarily exposed to and colonised by *E. coli* circulating in human networks. That said, we have rephrased this paragraph to reflect the uncertainty that the reviewer rightly highlights and acknowledged the need for further investigation.

### **Minor comments:**

Figure 1d - the y-axis should be the count (like in b) not the proportion IMHO, because the varying sample sizes per annum distort the perceived rates for the reader.

**Response:** Changed figure to count and updated legend in manuscript file.

**Methods:** "A custom R script was written in RStudio 1.4.1106 with R 4.0.5 to perform secondary analyses on the primary data generated by the aforementioned methods, and to

generate publication figures" - can you clarify which 2y analyses and which methods, it is not 100% clear for the reader.

**Response:** Updated as requested.

**Other comments:**

Roary was used, which is fine for this study, but the authors should note for the future that there are now superior methods (at least 4).

**Response:** Fair point, we will be updating to Panaroo for future work!

May 24, 2022

Prof. Steven Philip Djordjevic  
Australian Institute for Microbiology and Infection  
15 Broadway, University of Technology Sydney  
Ultimo, NSW 2007  
Australia

Re: Spectrum01291-22R1 (Genomic and temporal trends in canine ExPEC reflect those of human ExPEC)

Dear Prof. Steven Philip Djordjevic:

Your manuscript has been accepted, and I am forwarding it to the ASM Journals Department for publication. You will be notified when your proofs are ready to be viewed.

The ASM Journals program strives for constant improvement in our submission and publication process. Please tell us how we can improve your experience by taking this quick [Author Survey](#).

As an open-access publication, Spectrum receives no financial support from paid subscriptions and depends on authors' prompt payment of publication fees as soon as their articles are accepted. You will be contacted separately about payment when the proofs are issued; please follow the instructions in that e-mail. Arrangements for payment must be made before your article is published. For a complete list of **Publication Fees**, including supplemental material costs, please visit our [website](#).

ASM policy requires that data be available to the public upon online posting of the article, so please verify all links to sequence records, if present, and make sure that each number retrieves the full record of the data. If a new accession number is not linked or a link is broken, provide production staff with the correct URL for the record. If the accession numbers for new data are not publicly accessible before the expected online posting of the article, publication of your article may be delayed; please contact the ASM production staff immediately with the expected release date.

Corresponding authors may [join or renew ASM membership](#) to obtain discounts on publication fees. Need to upgrade your membership level? Please contact Customer Service at [Service@asmusa.org](mailto:Service@asmusa.org).

Thank you for submitting your paper to Spectrum.

Sincerely,

Cheryl Andam  
Editor, Microbiology Spectrum

Journals Department  
American Society for Microbiology  
1752 N St., NW  
Washington, DC 20036  
E-mail: [spectrum@asmusa.org](mailto:spectrum@asmusa.org)

Supplemental Dataset: Accept  
Supplemental Material 1: Accept
