# Supplementary material for: Genomic and Temporal Trends in Canine ExPEC Reflect Those of Human ExPEC
Source: PubMed Central journal article supplement (PMC9241711; doi:10.1128/spectrum.01291-22), 2022-06-08
Supplement: spectrum.01291-22-s0001.pdf [file spectrum.01291-22-s0001.pdf]

**Phylogroup**

- A
- B1
- B2
- C
- D
- E
- F
- G
- Cryptic

**Sequence Type**

|        |       |
|--------|-------|
| ST372  | ST961 |
| ST127  | ST131 |
| ST73   | ST117 |
| ST80   | ST963 |
| ST1193 | ST38  |
| ST141  | ST58  |
| ST135  | ST155 |
| ST95   | ST88  |
| ST12   | ST10  |

**ColV Plasmid**

- Yes
- No

**pUTI89-like Plasmid**

- Yes
- No

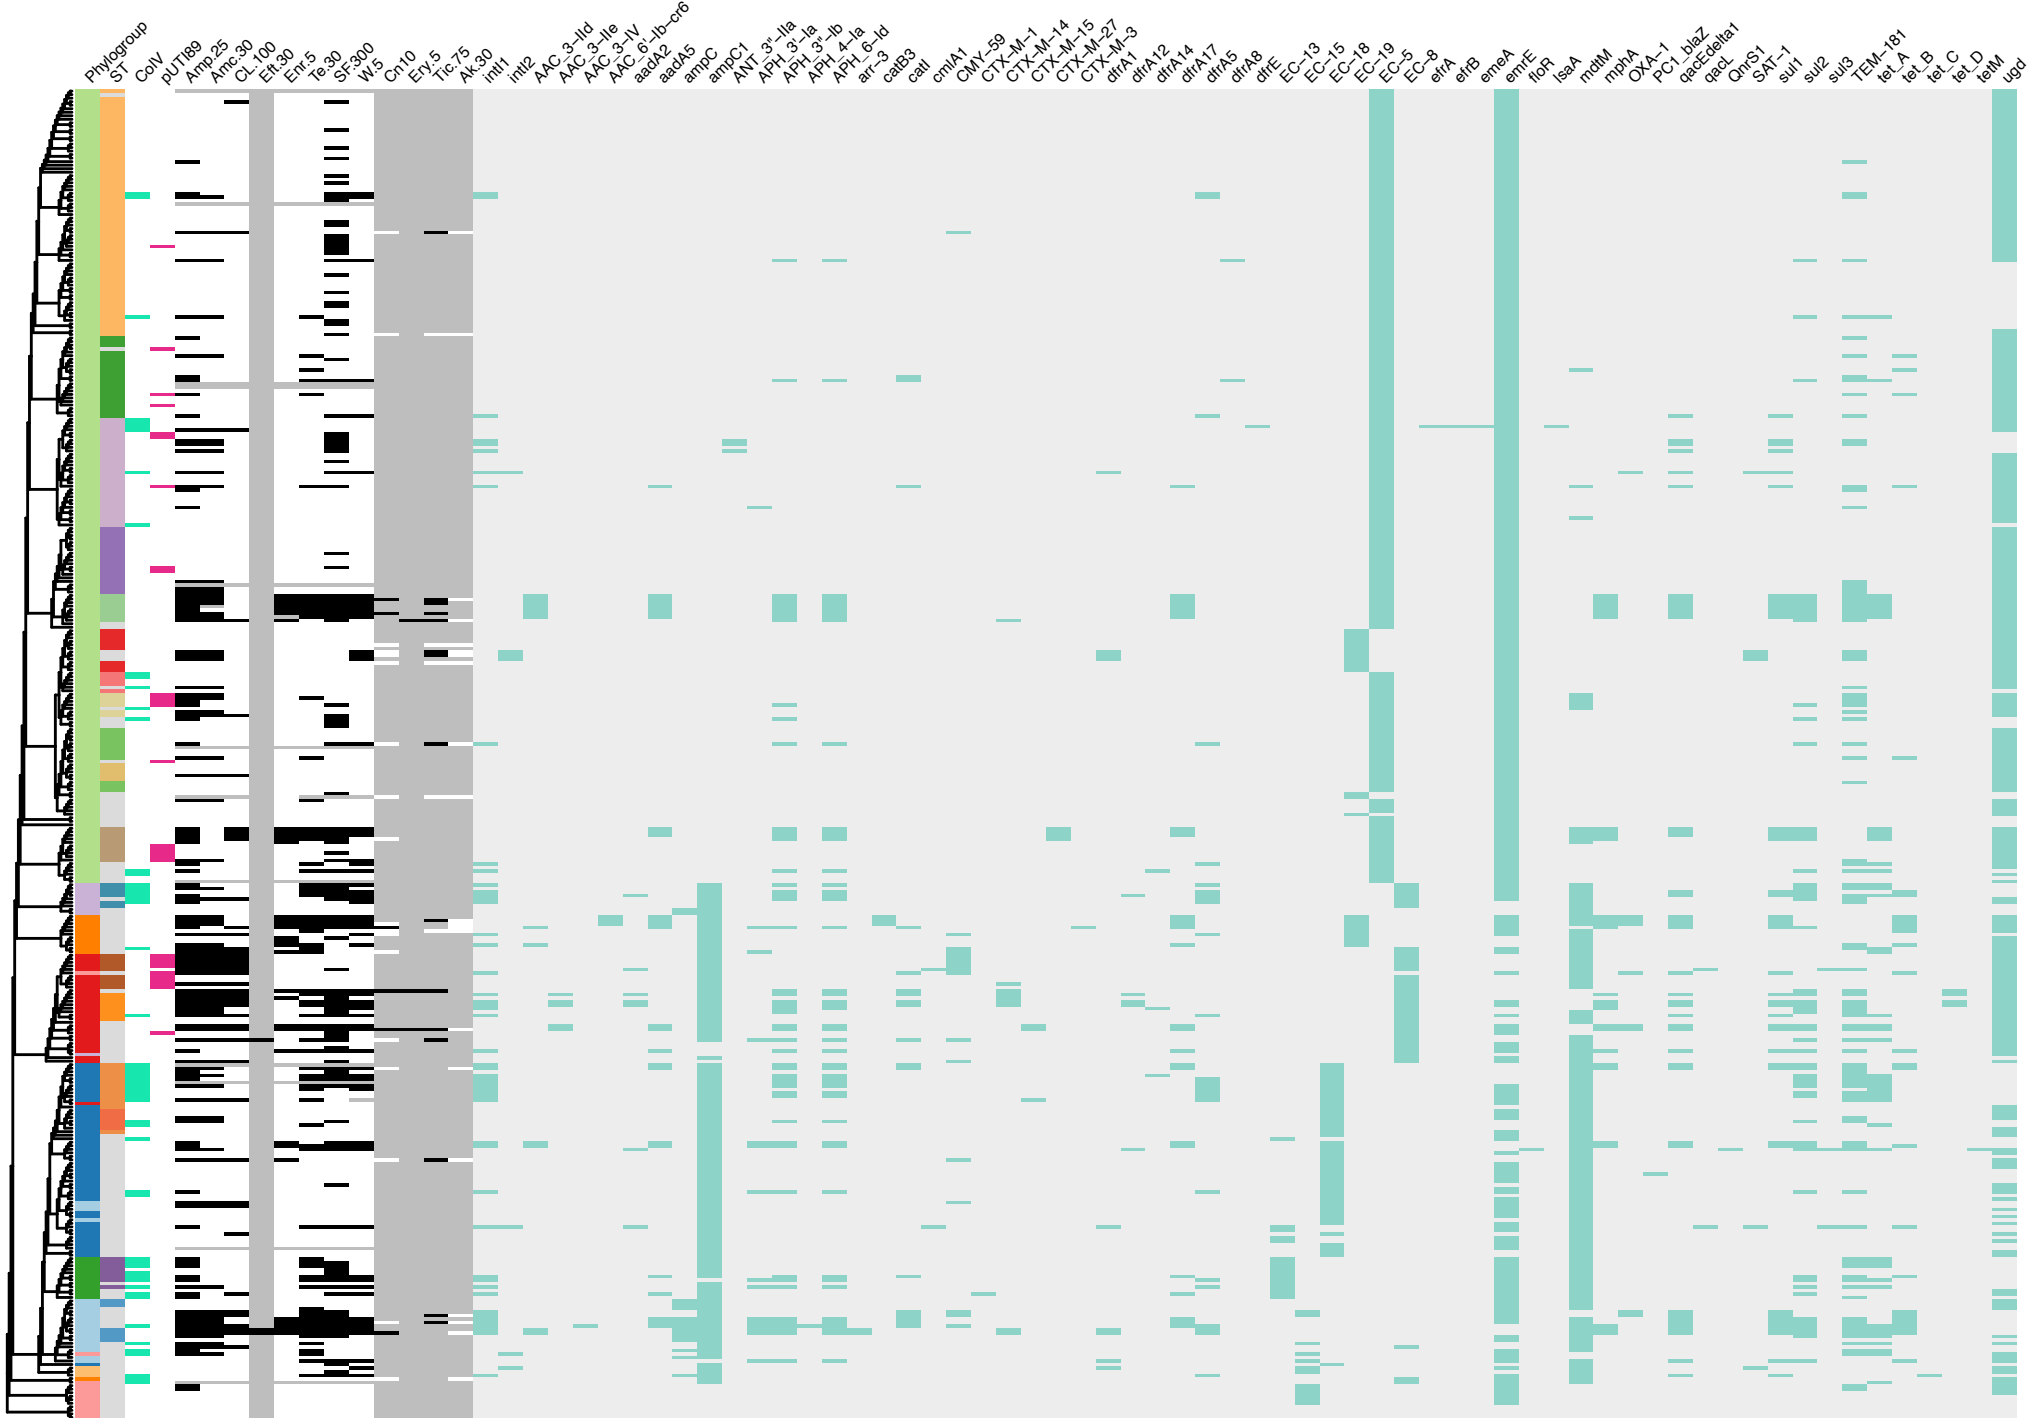

**Phylogroup**

- A
- B1
- B2
- C
- D
- E
- F
- G
- Cryptic

**Sequence Type**

|                                                                                                                                                       |                                                                                                                                                      |
|-------------------------------------------------------------------------------------------------------------------------------------------------------|------------------------------------------------------------------------------------------------------------------------------------------------------|
| <span style="display: inline-block; width: 10px; height: 10px; background-color: #f4a460; border: 1px solid black; margin-right: 5px;"></span> ST372  | <span style="display: inline-block; width: 10px; height: 10px; background-color: #e0e080; border: 1px solid black; margin-right: 5px;"></span> ST961 |
| <span style="display: inline-block; width: 10px; height: 10px; background-color: #4CAF50; border: 1px solid black; margin-right: 5px;"></span> ST127  | <span style="display: inline-block; width: 10px; height: 10px; background-color: #c0c080; border: 1px solid black; margin-right: 5px;"></span> ST131 |
| <span style="display: inline-block; width: 10px; height: 10px; background-color: #d1c4e9; border: 1px solid black; margin-right: 5px;"></span> ST73   | <span style="display: inline-block; width: 10px; height: 10px; background-color: #64b5f6; border: 1px solid black; margin-right: 5px;"></span> ST117 |
| <span style="display: inline-block; width: 10px; height: 10px; background-color: #9575cd; border: 1px solid black; margin-right: 5px;"></span> ST80   | <span style="display: inline-block; width: 10px; height: 10px; background-color: #8d6e63; border: 1px solid black; margin-right: 5px;"></span> ST963 |
| <span style="display: inline-block; width: 10px; height: 10px; background-color: #c8e6c9; border: 1px solid black; margin-right: 5px;"></span> ST1193 | <span style="display: inline-block; width: 10px; height: 10px; background-color: #ffb74d; border: 1px solid black; margin-right: 5px;"></span> ST38  |
| <span style="display: inline-block; width: 10px; height: 10px; background-color: #e57373; border: 1px solid black; margin-right: 5px;"></span> ST141  | <span style="display: inline-block; width: 10px; height: 10px; background-color: #ffb74d; border: 1px solid black; margin-right: 5px;"></span> ST58  |
| <span style="display: inline-block; width: 10px; height: 10px; background-color: #e57373; border: 1px solid black; margin-right: 5px;"></span> ST135  | <span style="display: inline-block; width: 10px; height: 10px; background-color: #ffb74d; border: 1px solid black; margin-right: 5px;"></span> ST155 |
| <span style="display: inline-block; width: 10px; height: 10px; background-color: #e0e080; border: 1px solid black; margin-right: 5px;"></span> ST95   | <span style="display: inline-block; width: 10px; height: 10px; background-color: #9575cd; border: 1px solid black; margin-right: 5px;"></span> ST88  |
| <span style="display: inline-block; width: 10px; height: 10px; background-color: #4CAF50; border: 1px solid black; margin-right: 5px;"></span> ST12   | <span style="display: inline-block; width: 10px; height: 10px; background-color: #64b5f6; border: 1px solid black; margin-right: 5px;"></span> ST10  |

**ColV Plasmid**

- Yes
- No

**pUT189-like Plasmid**

- Yes
- No

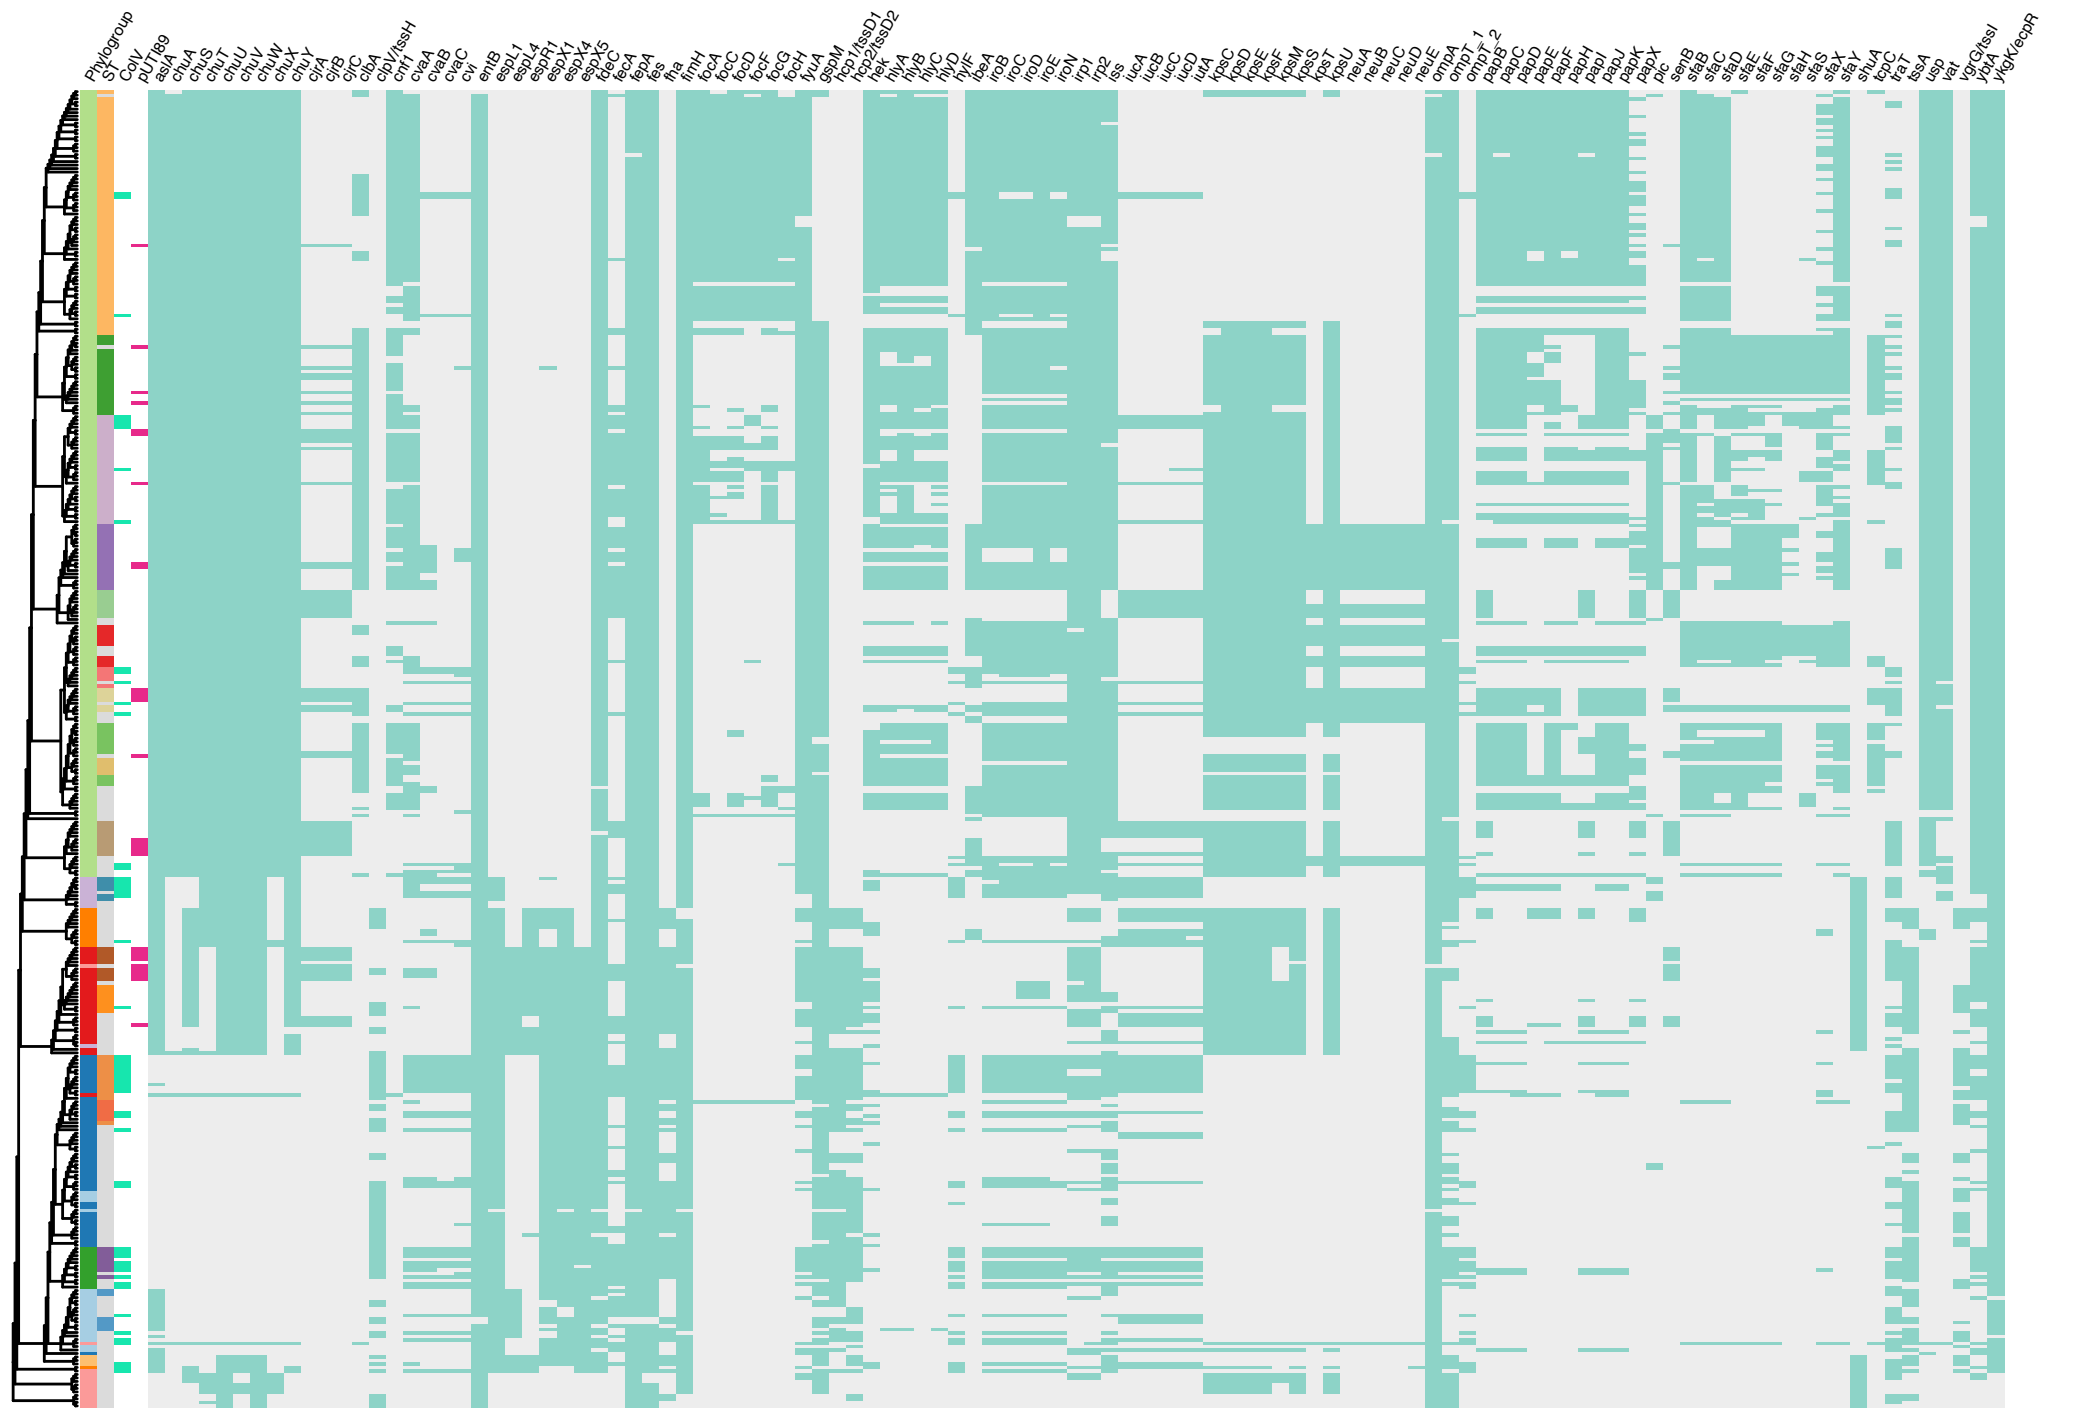

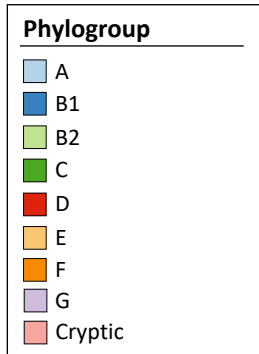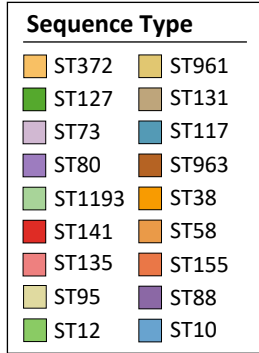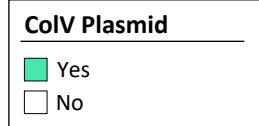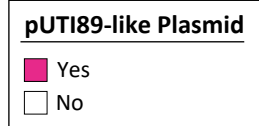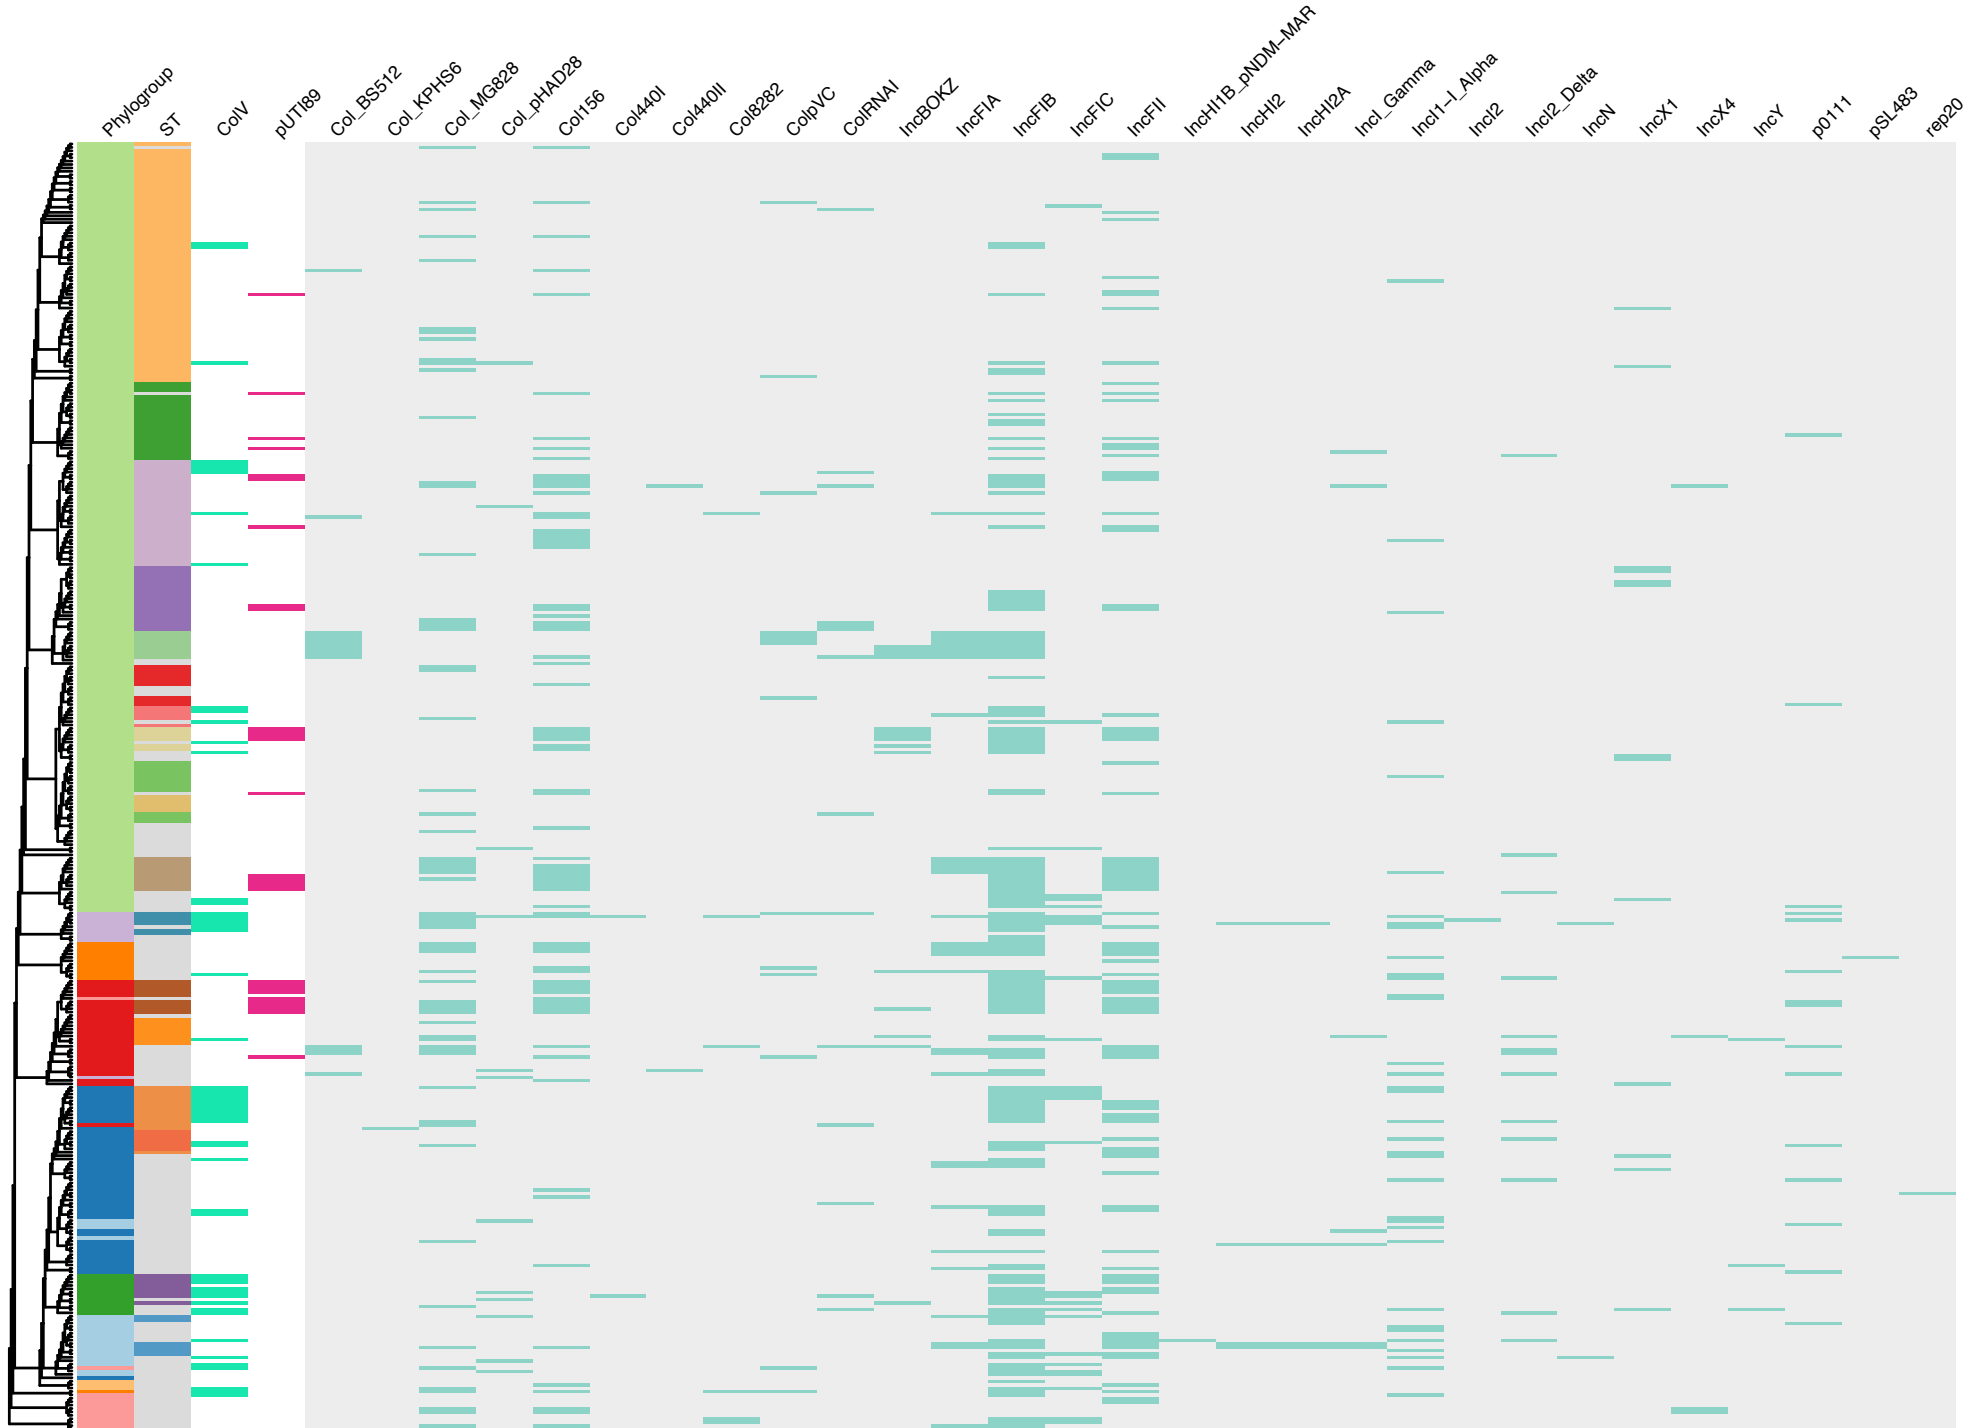

**Phylogroup (1)**

- A
- B1
- B2
- C
- D
- E
- F
- G
- Cryptic

**Sequence Type (2)**

- ST372
- ST127
- ST73
- ST80
- ST1193
- ST141
- ST135
- ST95
- ST12
- ST961
- ST131
- ST117
- ST963
- ST38
- ST58
- ST155
- ST88
- ST10

**pUTI89-like plasmid (3)**

- Yes
- No

**Genes**

- Virulence
- Insertion sequence
- Plasmid function
- Putative function
- Hypothetical protein

**BLAST Identity**

- >90%

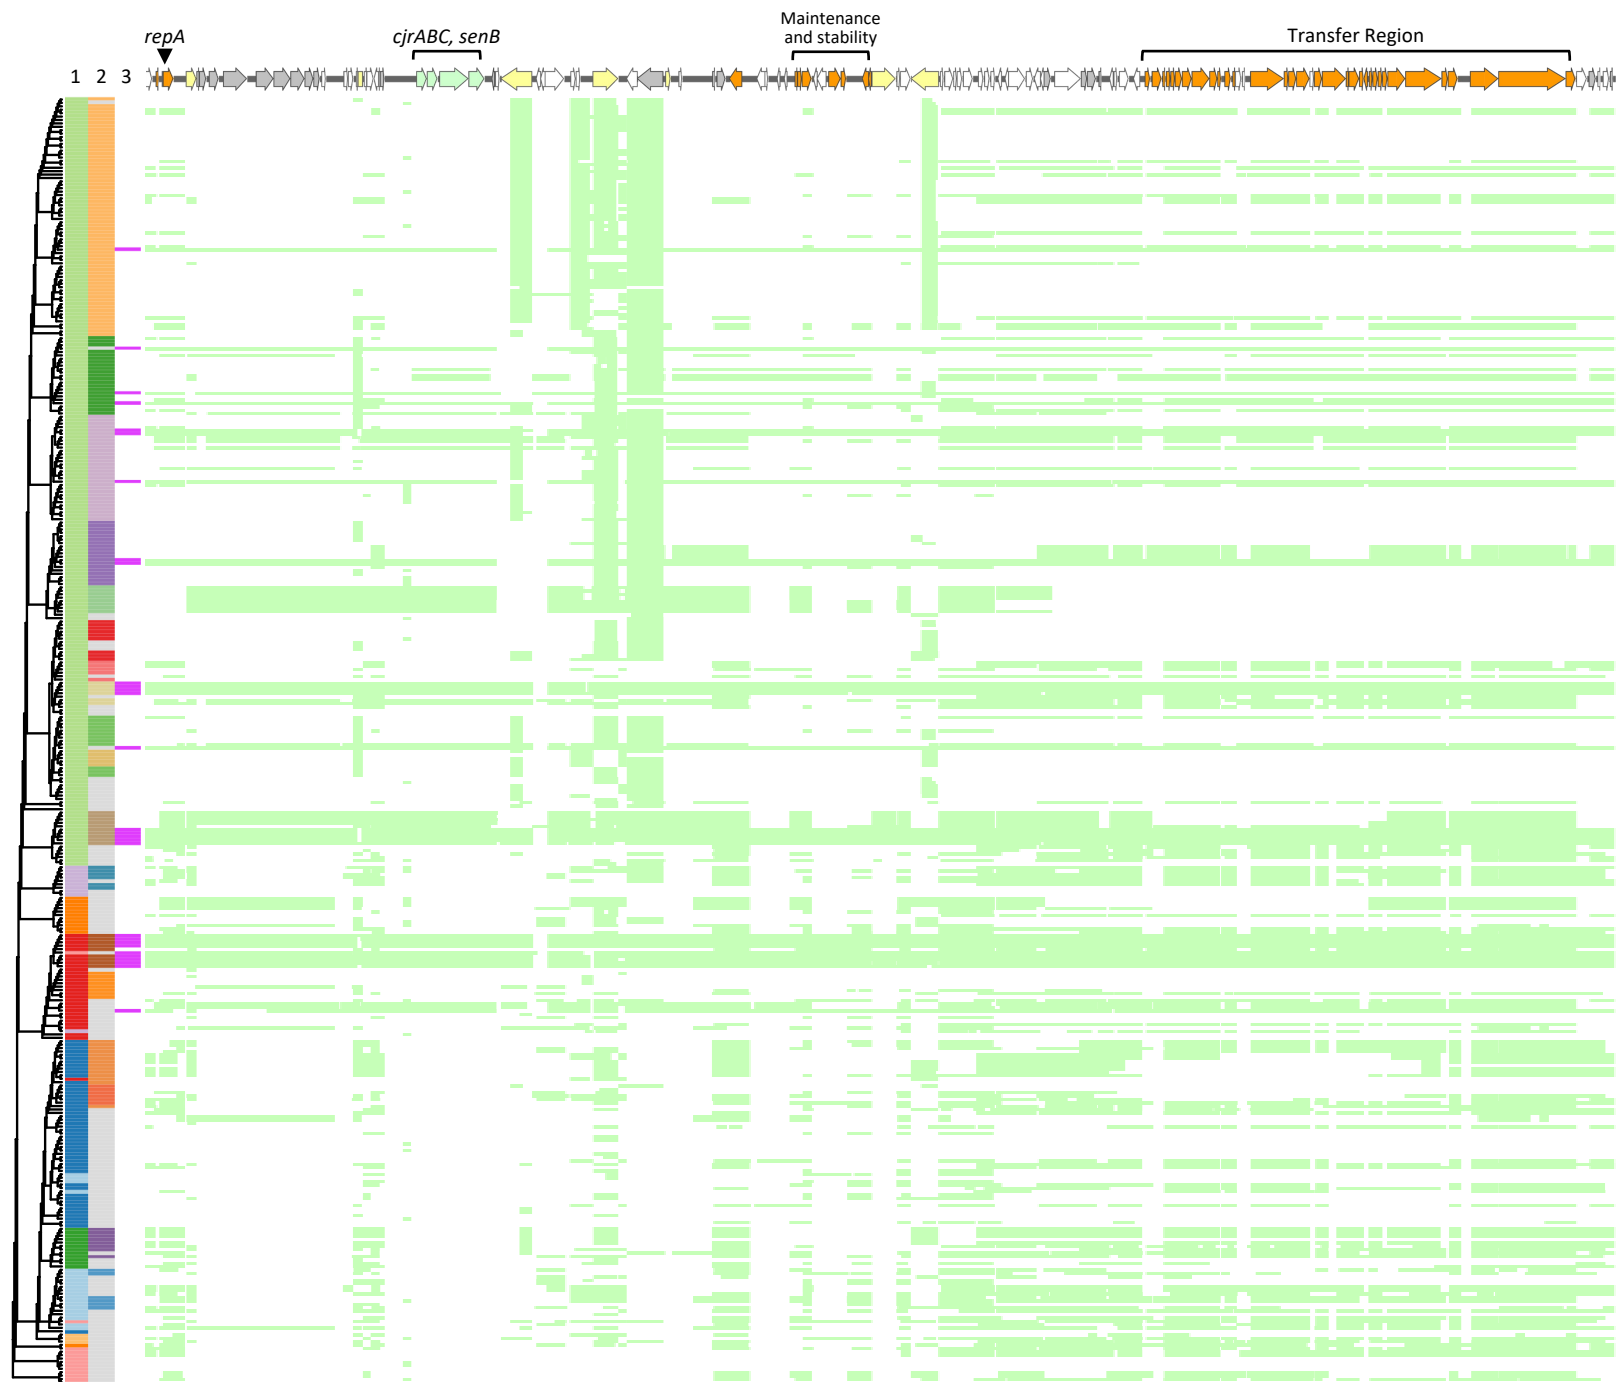

### Phylogroup (1)

- A
- B1
- B2
- C
- D
- E
- F
- G
- Cryptic

### Sequence Type (2)

- ST372
- ST961
- ST127
- ST131
- ST73
- ST117
- ST80
- ST963
- ST1193
- ST38
- ST141
- ST58
- ST135
- ST155
- ST95
- ST88
- ST12
- ST10

### ColV plasmid (3)

- Yes
- No

### Genes

- Virulence
- Insertion sequence
- Plasmid function
- Putative function
- Hypothetical protein

### BLAST Identity

- >90%

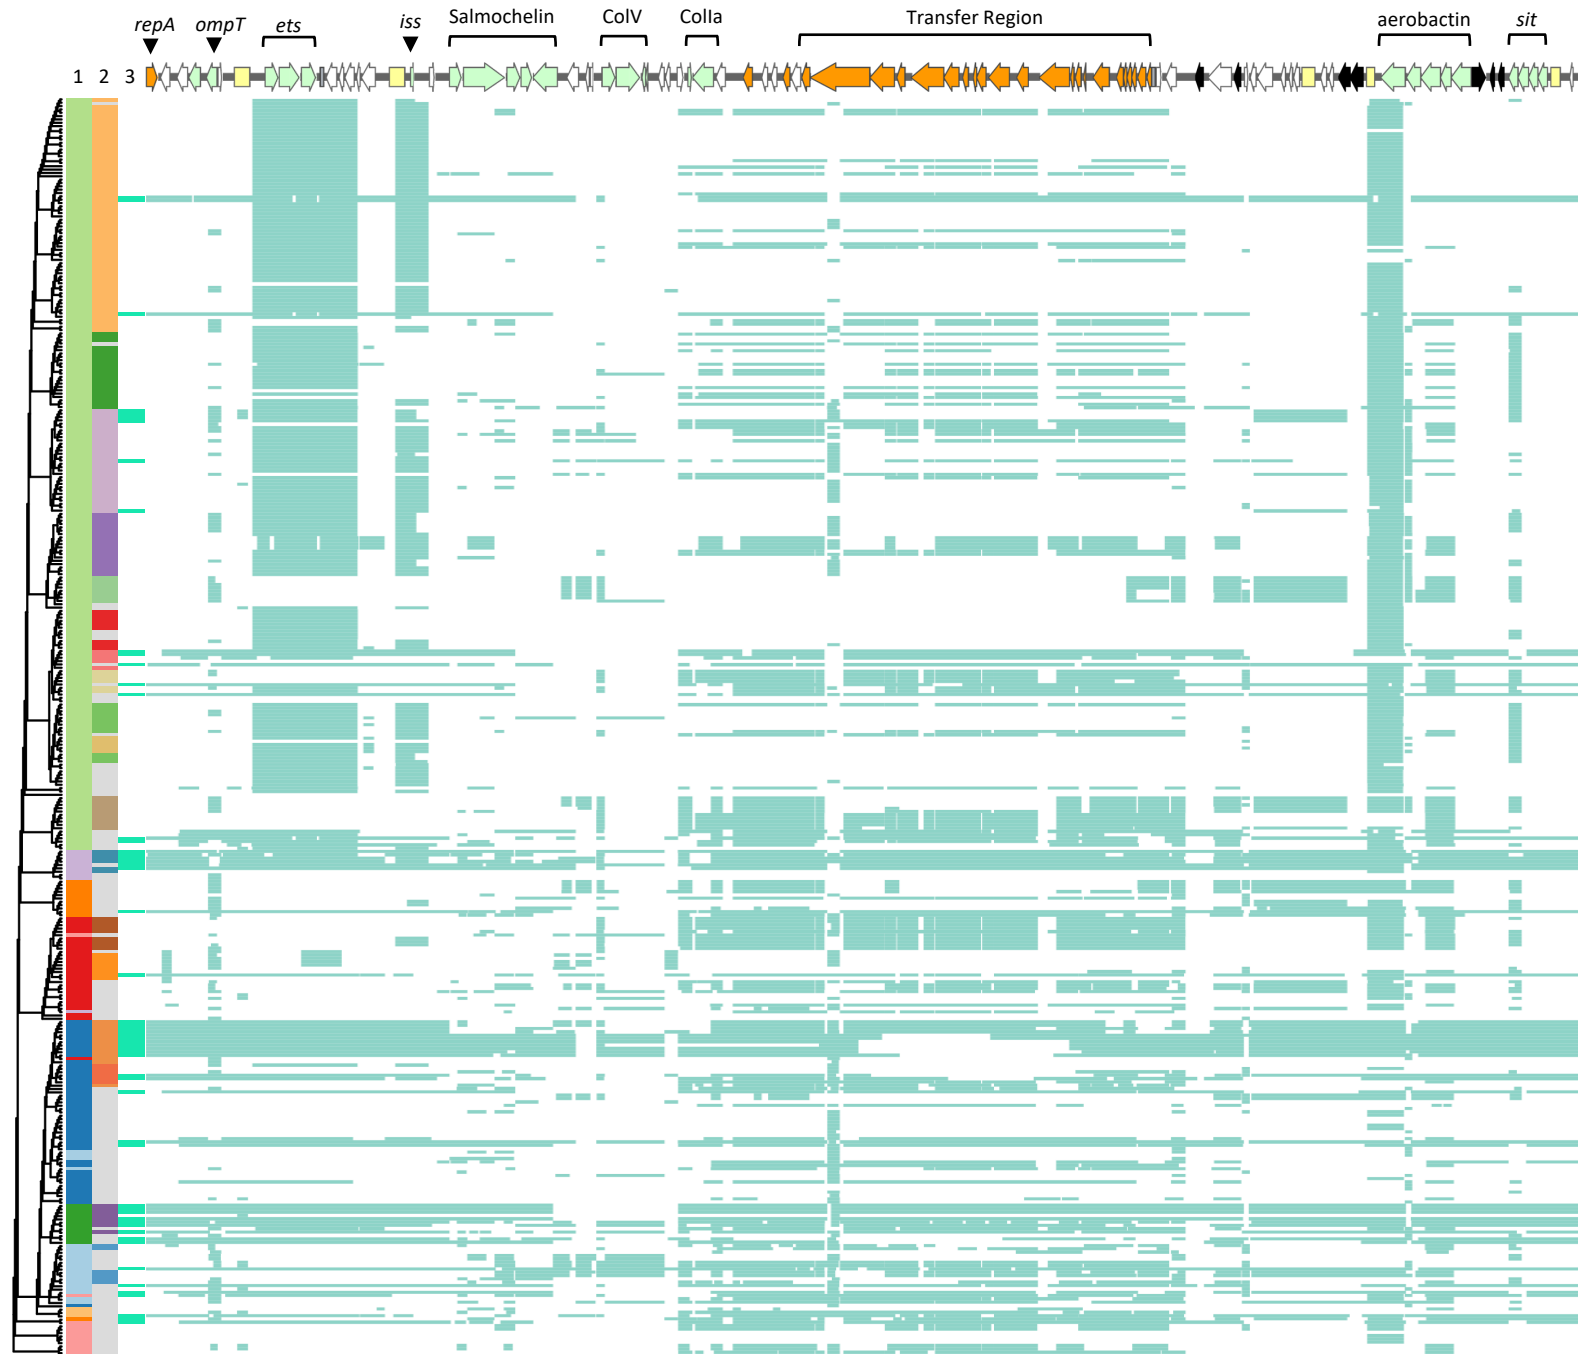

Figure S1. Antimicrobial resistance heatmap. Binary heatmap of antimicrobial resistance phenotype (black/white) and resistance gene presence/absence (green/grey) aligned to core gene phylogeny with metadata.

Figure S2. Virulence-associated gene heatmap. Binary heatmap of virulence-associated gene presence/absence (green/grey) aligned to core gene phylogeny with metadata.

Figure S3. Plasmid-associated gene heatmap. Binary heatmap of plasmid-associated gene presence/absence (green/grey) aligned to core gene phylogeny with metadata.

Figure S4. Sequence mapping to pUTI89. Heatmap of nucleotide identity across 100bp segments of the pUTI89 backbone. Metadata for phylogroup and ST are shown. Pink metadata bars show isolates matching at least 90% of the backbone and/or carrying F29:A-B10 RST.

Figure S5. Sequence mapping to pCERC4. Heatmap of nucleotide identity across 100bp segments of the pCERC4 backbone. Metadata for phylogroup and ST are shown. Green bars show isolates determined to carry a CoIV plasmid based on the Liu criteria (see Methods).
